# Supplementary material for: Monoacylglycerides from the Diatom Skeletonema marinoi Induce Selective Cell Death in Cancer Cells
Source: PubMed Central journal article supplement (PMC6891494; doi:10.3390/md17110625), 2019-11-01
Supplement: marinedrugs-17-00625-s001.pdf [file marinedrugs-17-00625-s001.pdf]

# Monoacylglycerides from the diatom *Skeletonema marinoi* induce selective cell death in cancer cells

Marco Miceli <sup>1,§</sup>, Adele Cutignano <sup>2,§</sup>, Mariarosaria Conte <sup>3,§</sup>, Raffaella Ummarino <sup>4,6</sup>, Alessandra Romanelli <sup>5</sup>, Menotti Ruvo <sup>4</sup>, Marilisa Leone <sup>4</sup>, Flavia Anna Mercurio <sup>4</sup>, Nunziata Doti <sup>4</sup>, Emiliano Manzo <sup>2</sup>, Giovanna Romano <sup>6,\*</sup>, Lucia Altucci <sup>3,\*</sup> and Adrianna Ianora <sup>6</sup>.

## Supplementary Information

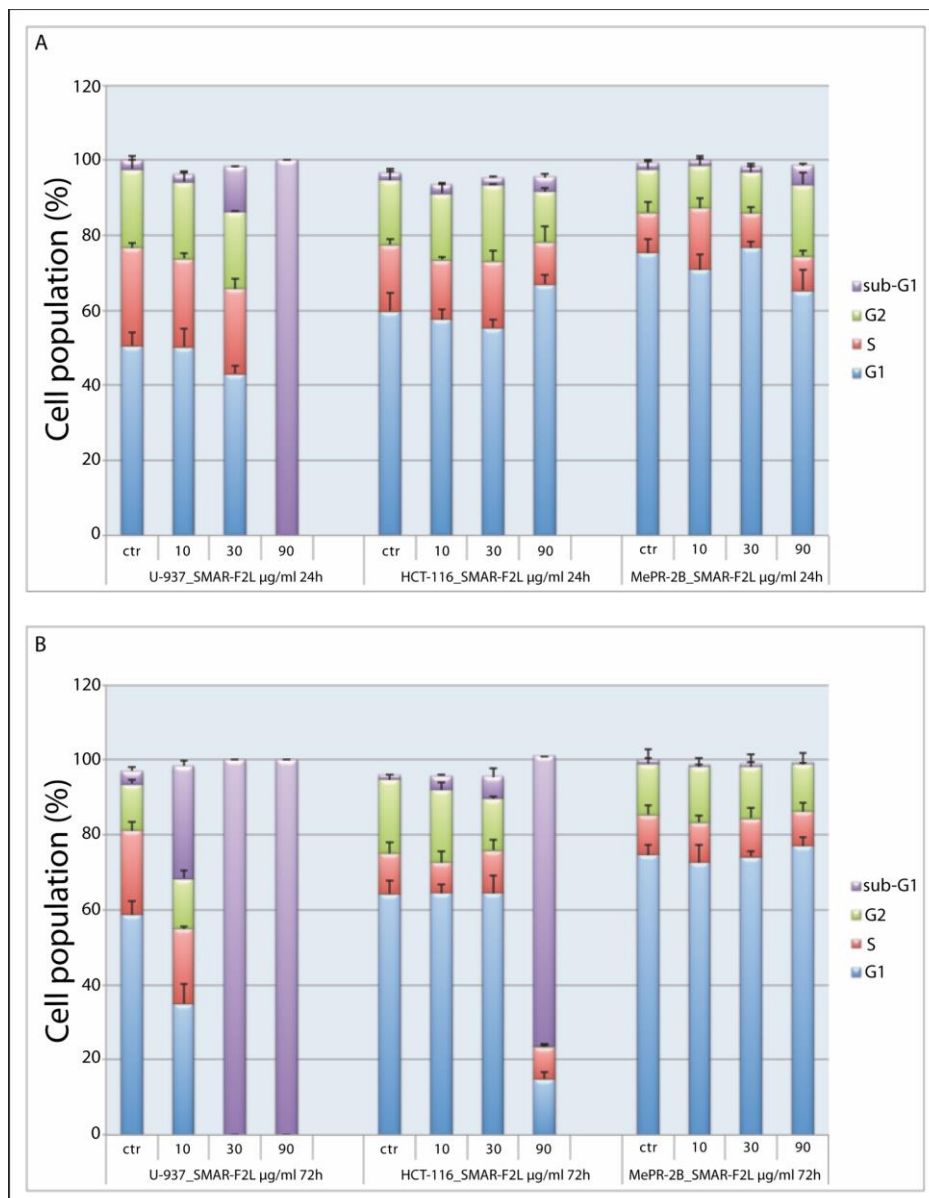

**Figure S1.** Cell cycle distribution in U-937, HCT-116 and MePR-2B cells after treatment for 24 (A) and 72 hours (B) with fraction SMAR-F2L at 10, 30 and 90 µg/ml with the vehicle DMSO (control). All bars represent means  $\pm$  SD with n = 3.

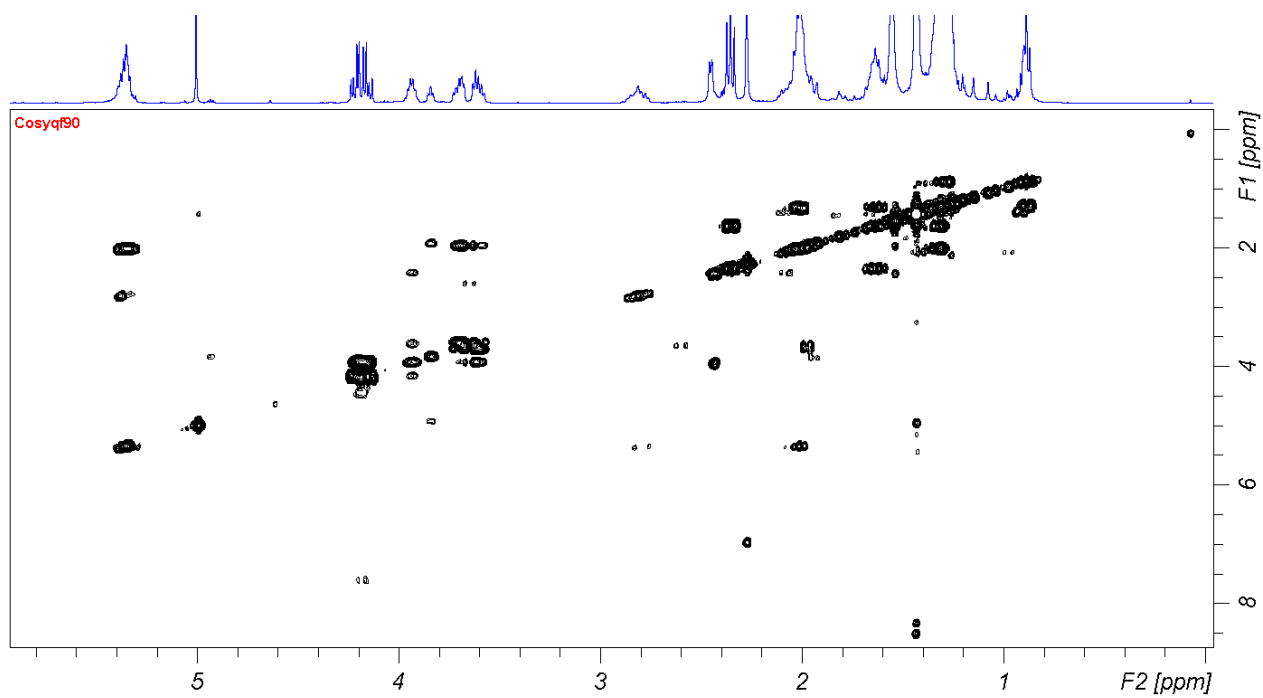

Figure S2. <sup>1</sup>H, <sup>1</sup>H COSY-NMR spectrum (400MHz, CDCl<sub>3</sub>) of fraction SMAR-F2L.

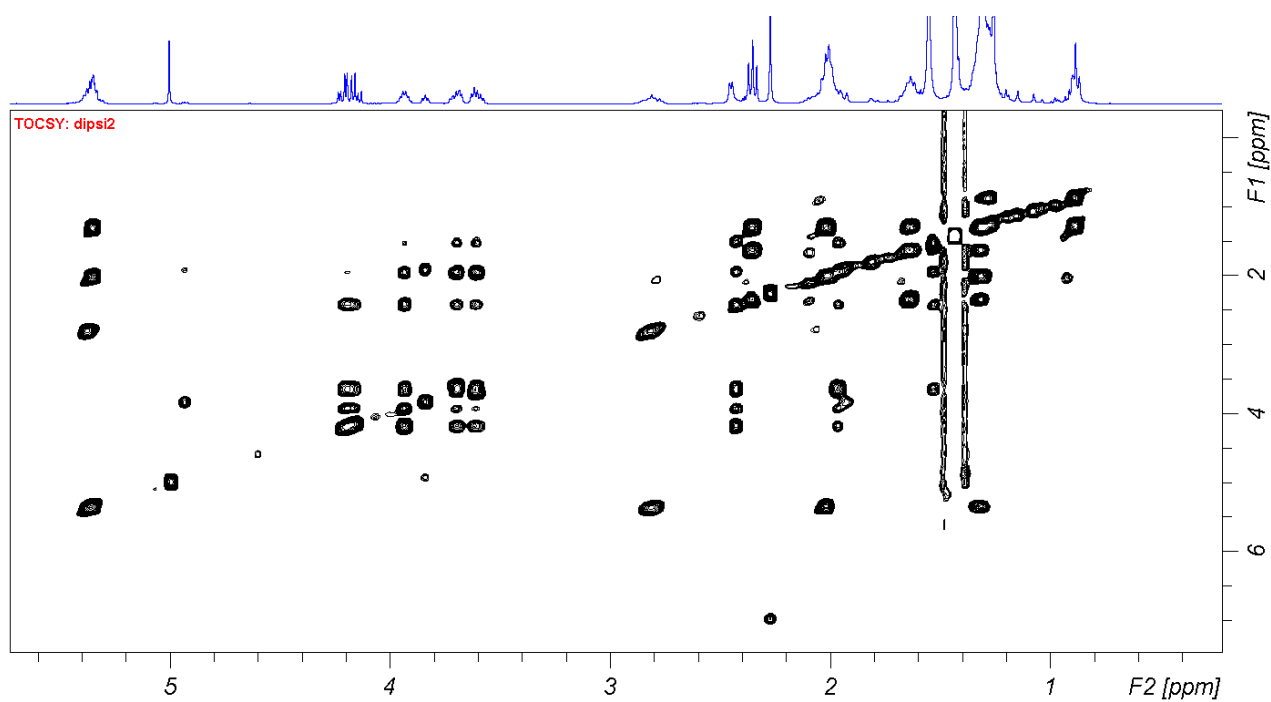

Figure S3. <sup>1</sup>H, <sup>1</sup>H TOCSY-NMR spectrum (400MHz, CDCl<sub>3</sub>) of fraction SMAR-F2L.

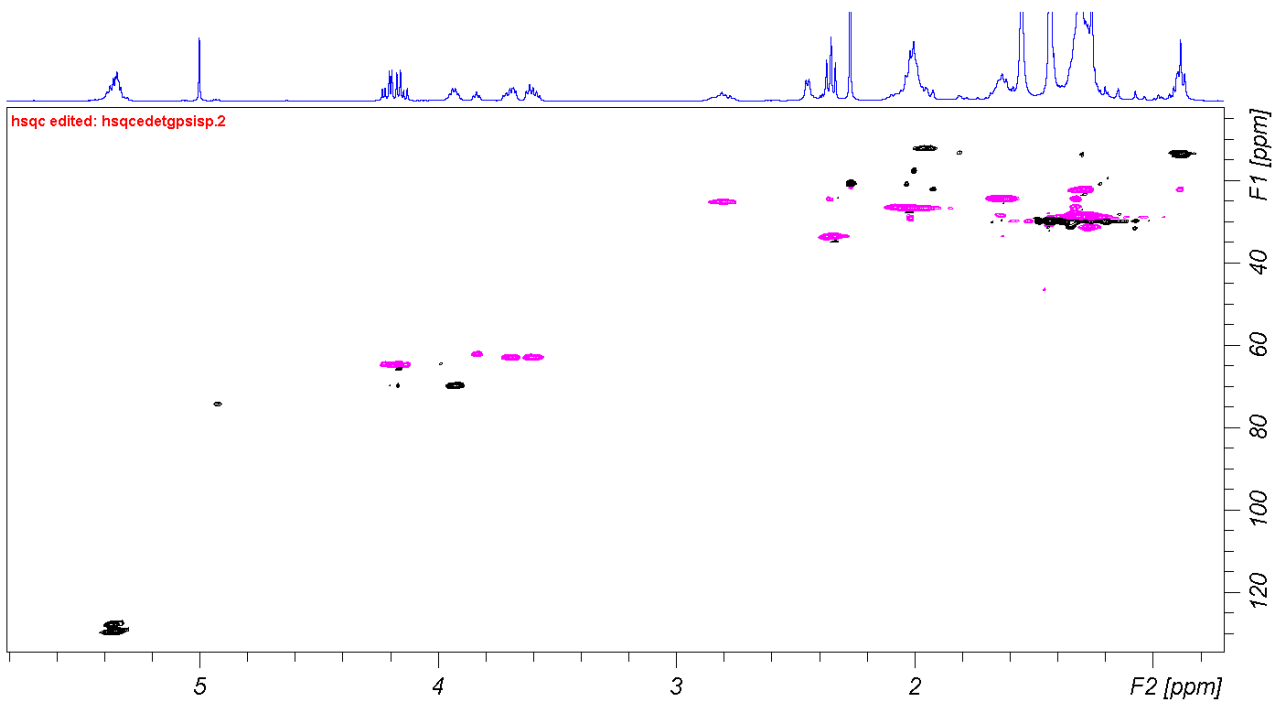

Figure S4. Edited-HSQC NMR spectrum (400MHz, CDCl<sub>3</sub>) of fraction SMAR-F2L.

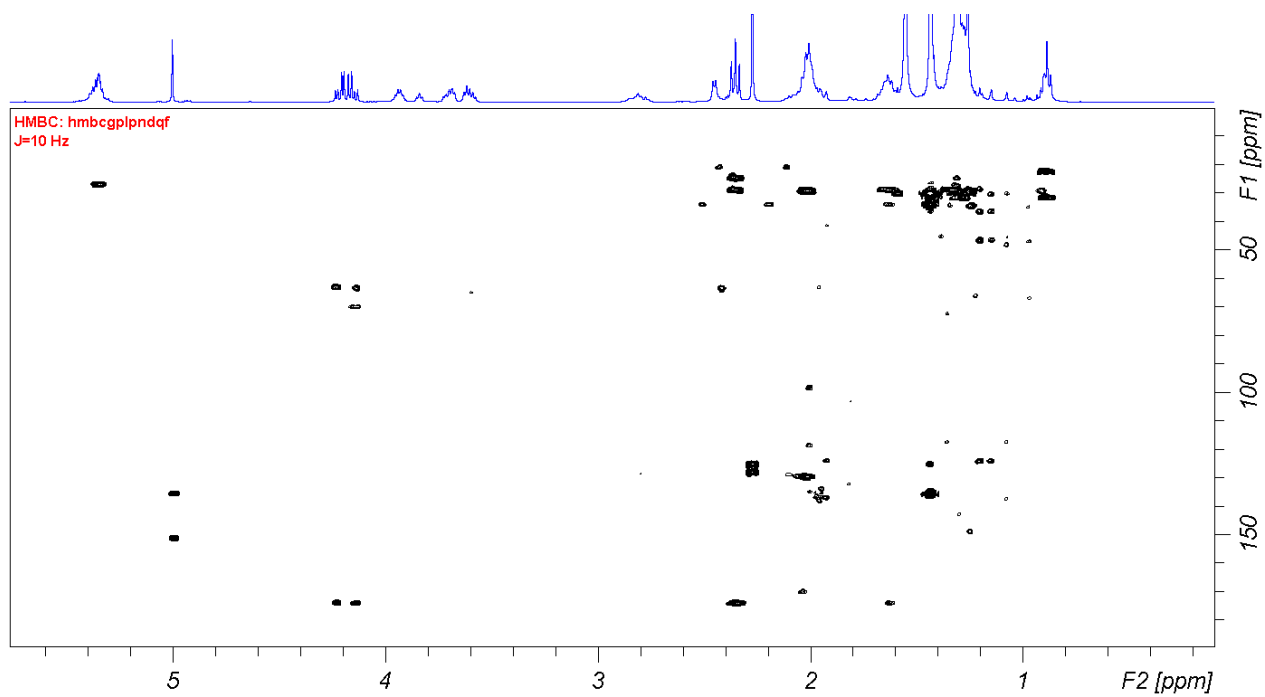

Figure S5. HMBC-NMR spectrum (400MHz, CDCl<sub>3</sub>) of fraction SMAR-F2L.

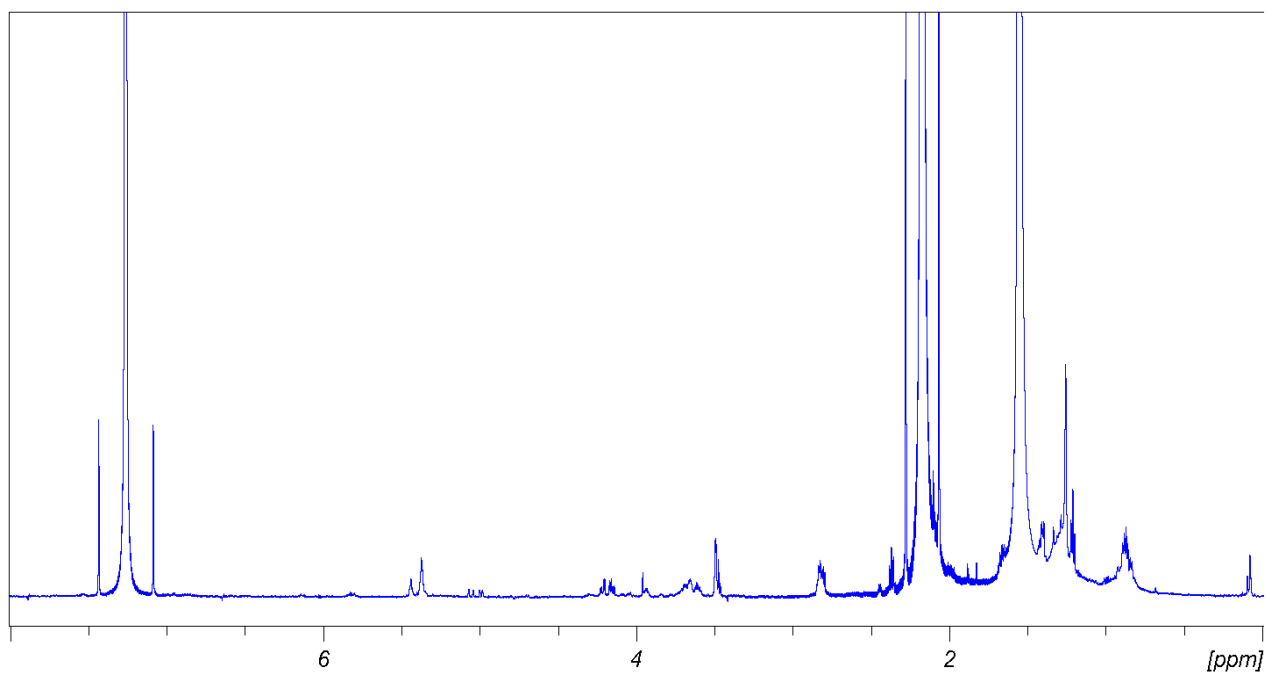

**Figure S6.** <sup>1</sup>H-NMR spectrum (600MHz, CDCl<sub>3</sub>) of MAG-C16:4.

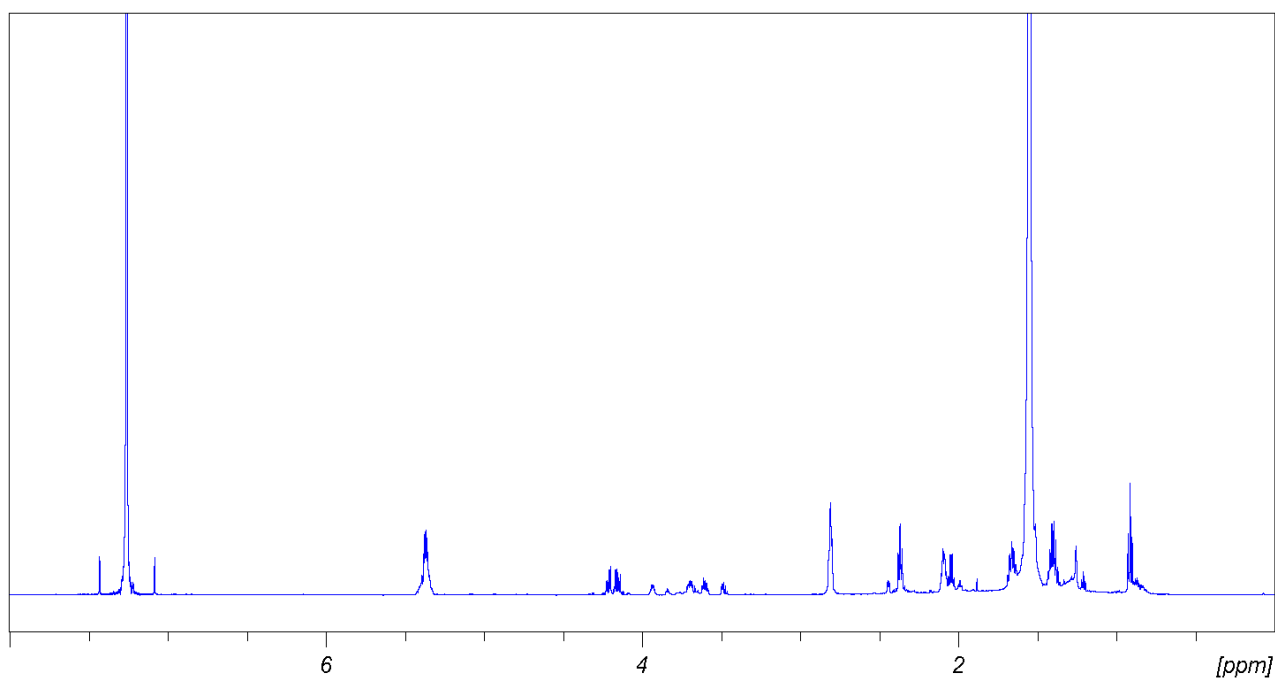

**Figure S7.** <sup>1</sup>H-NMR spectrum (600MHz, CDCl<sub>3</sub>) of MAG-C16:3

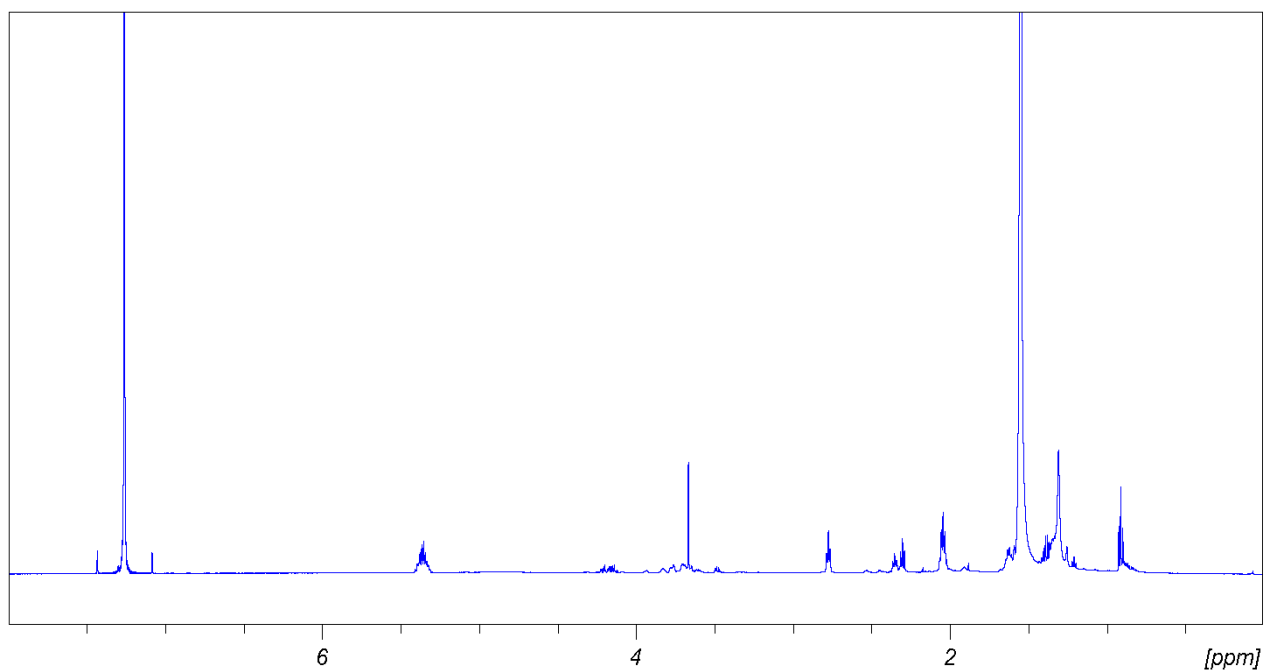

**Figure S8.** <sup>1</sup>H-NMR spectrum (600MHz, CDCl<sub>3</sub>) of MAG-C16:2

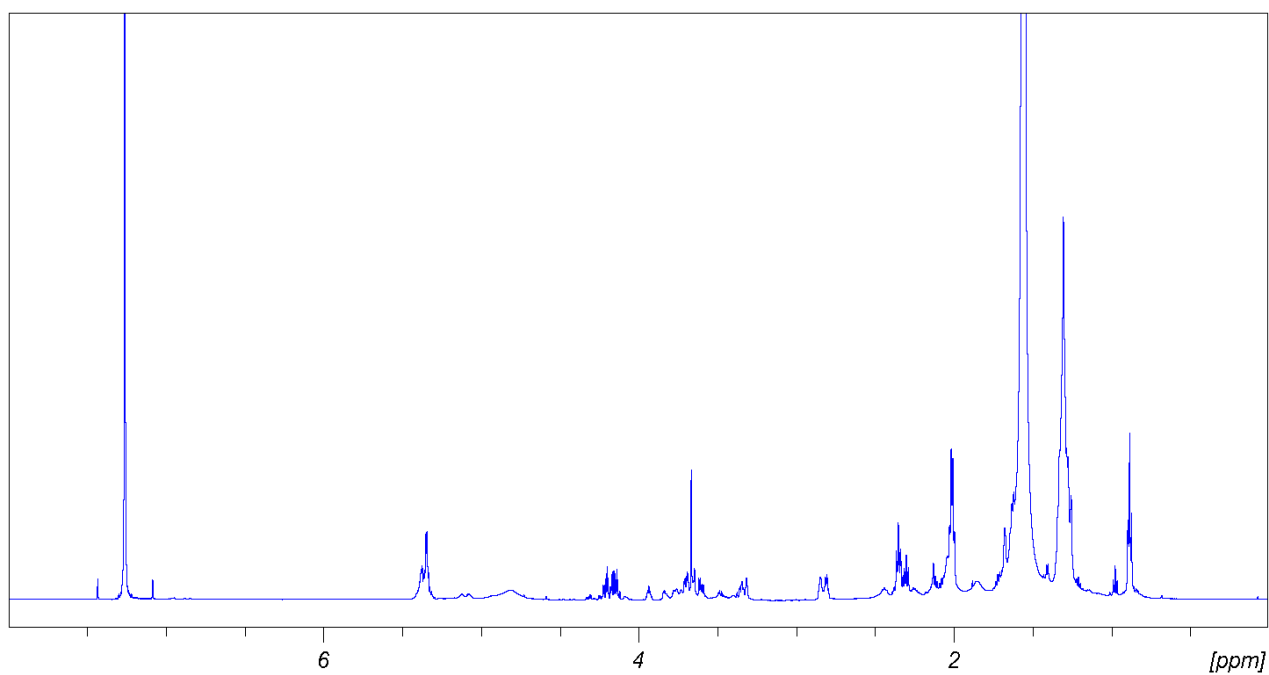

**Figure S9.** <sup>1</sup>H-NMR spectrum (600MHz, CDCl<sub>3</sub>) of MAG mixture EPA/C18:3.

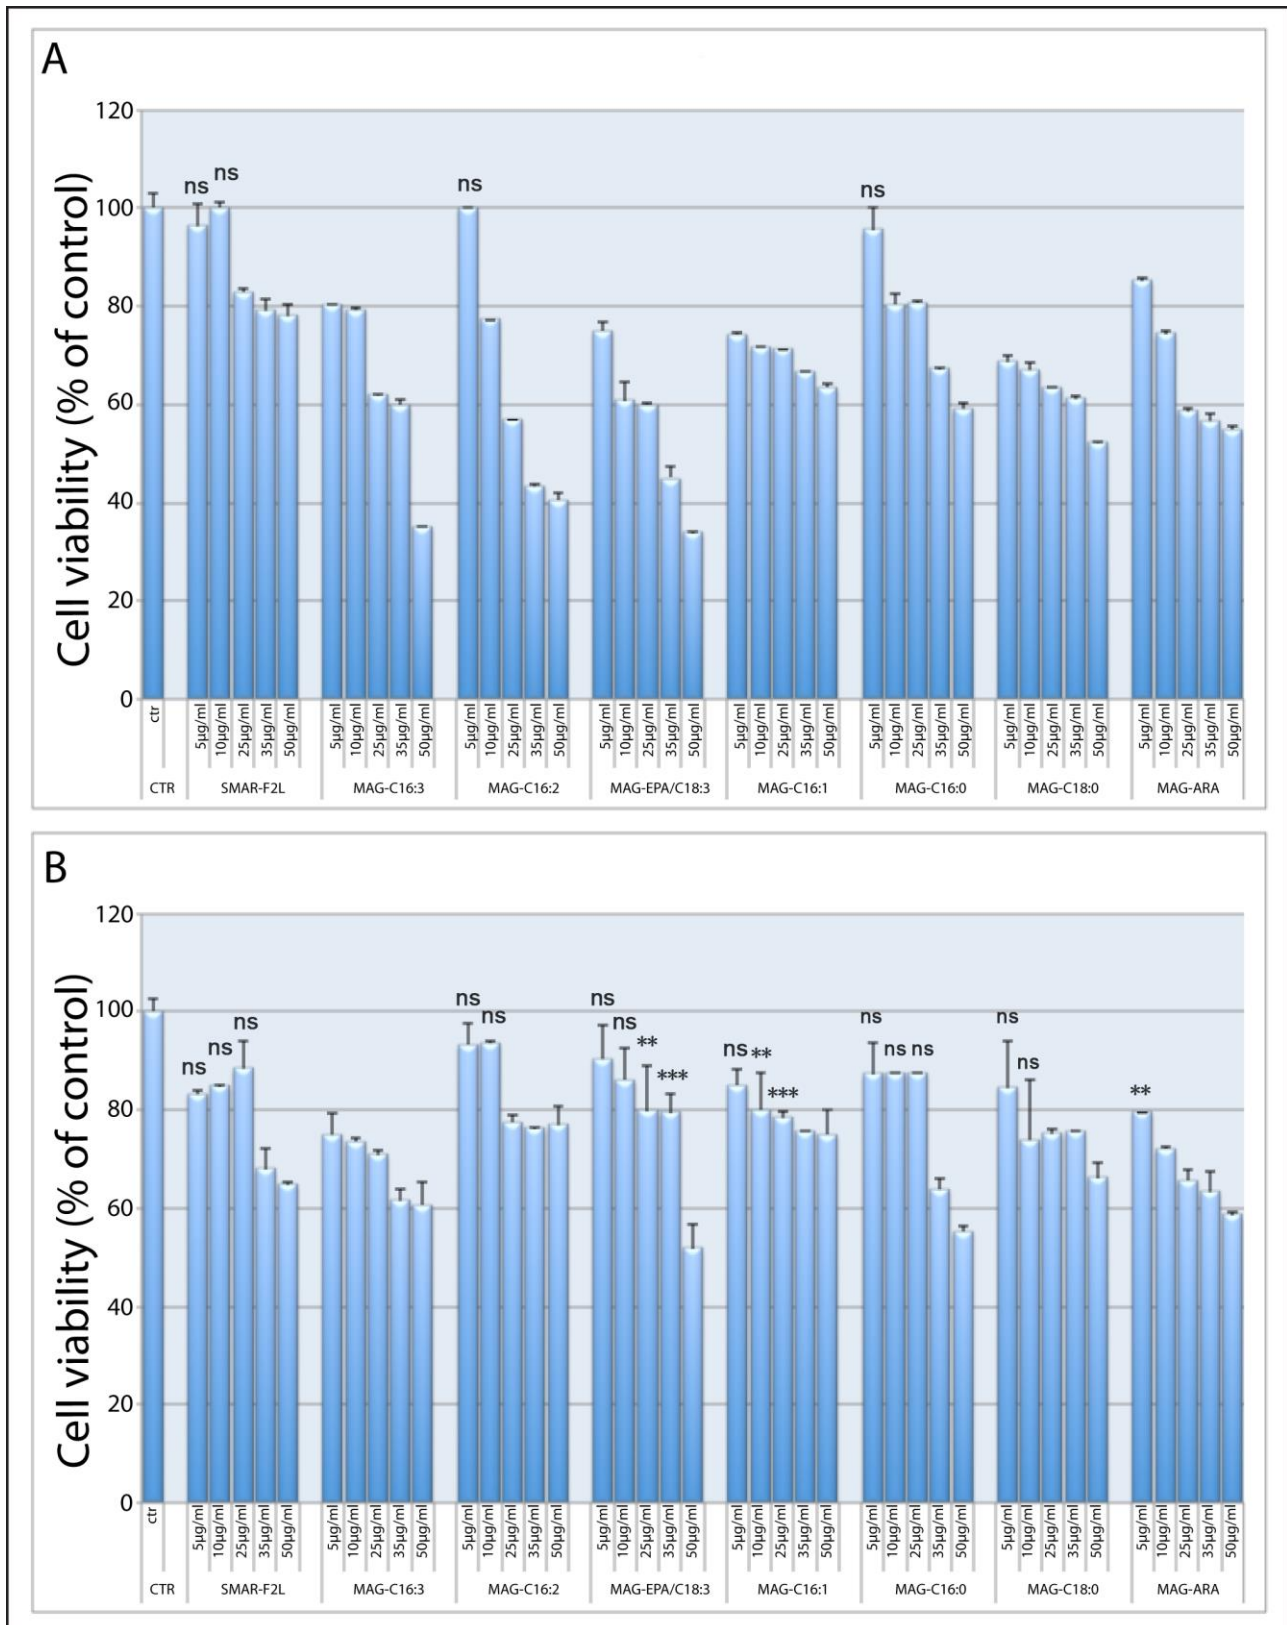

**Figure S10.** Cell viability assay (MTT) on U-937 (A) and HCT-116 (B) cell lines after 24 hours of treatment with purified and commercial MAGs at increasing concentrations of 5, 10, 25, 35 and 50 µg/ml. All bars represent means ± SD with n = 3.

Only differences non-significant with respect to the control (ns) and difference with p-value < 0.05 (\*), p < 0.01 (\*\*), and p < 0.001 (\*\*\*) are indicated. Extremely significant differences (p < 0.0001), which are the majority, are not indicated to avoid overcrowding of symbols (ANOVA, with Tukey's test; p < 0.01 was considered significant).

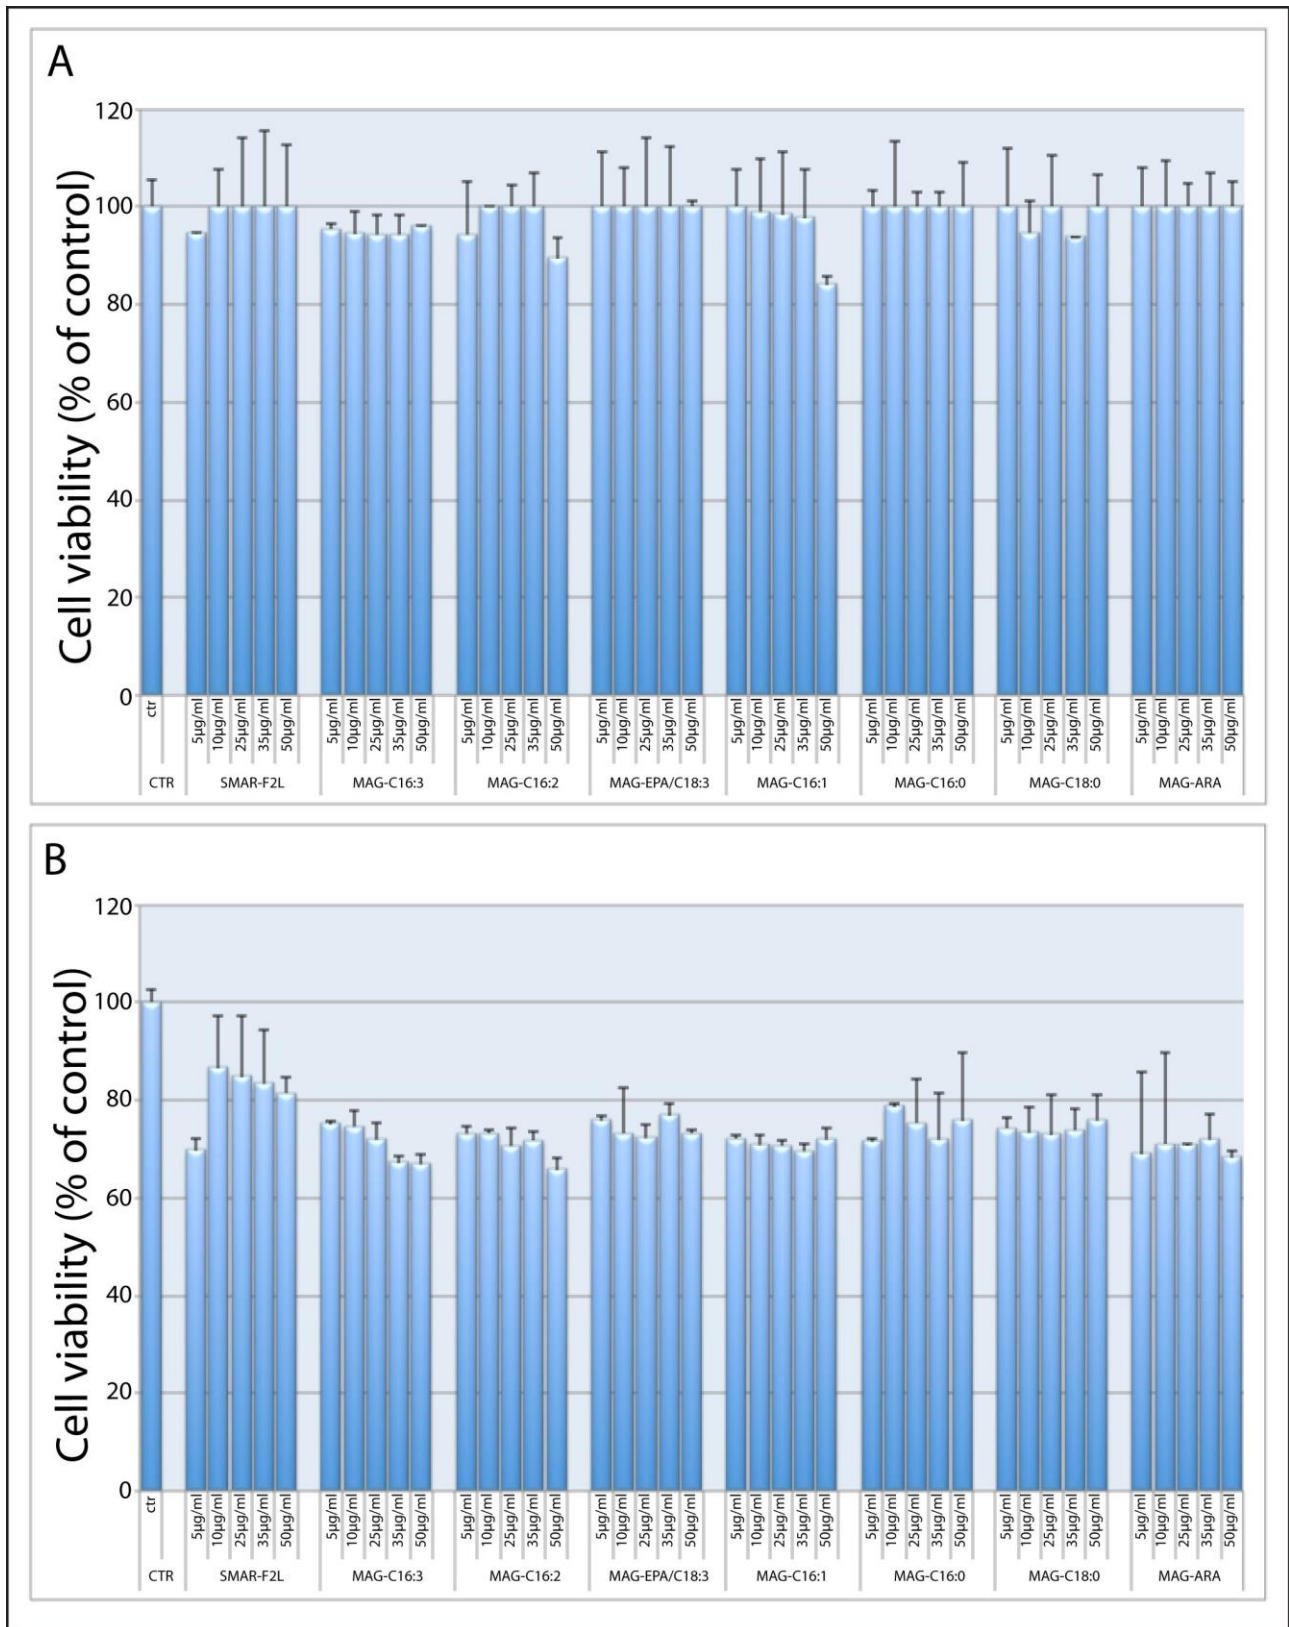

**Figure S11.** Cell viability assay (MTT) on MePR-2B cells after 24 (A) and 48 hours (B) of treatment with purified and commercial MAGs at increasing concentrations of 5, 10, 25, 35 and 50 µg/ml. All bars represent means ± SD with n = 3. No significant difference was observed (ANOVA, with Tukey's test; p<0.01 was considered significant)

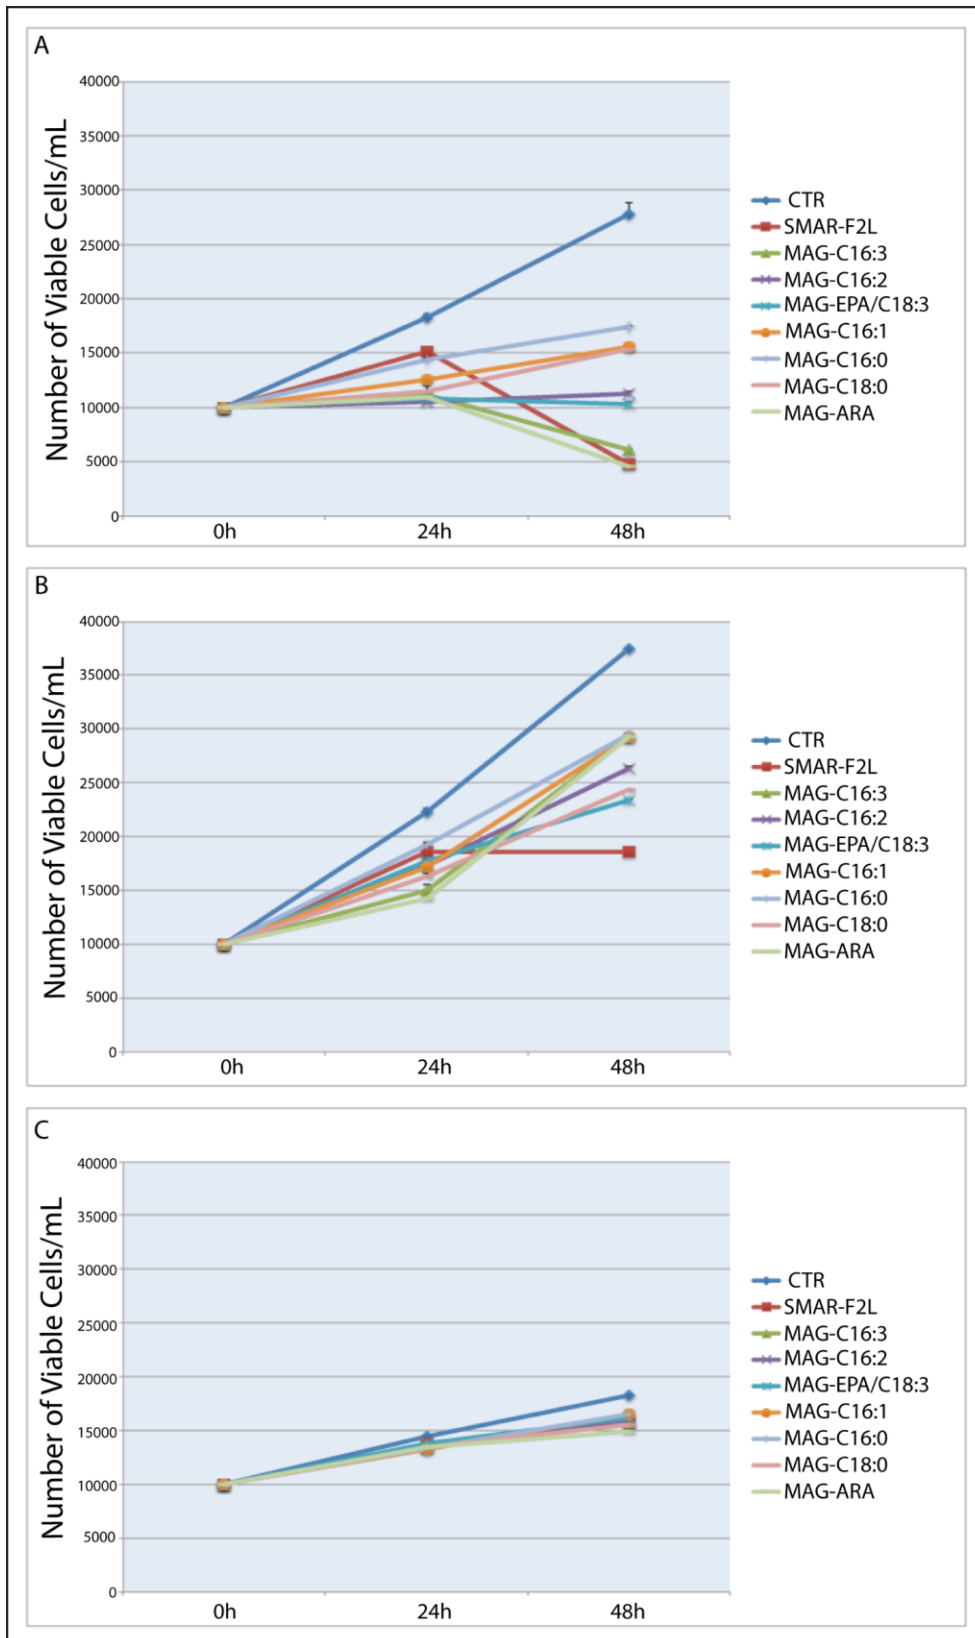

**Figure S12.** Cell proliferation assay on U-937 (A), HCT-116 (B) and MePR-2B (C) cells after 24 and 48 hours of treatment with purified and commercial MAGs at the concentration of 25 $\mu$ g/ml. All points represent means  $\pm$  SD with n = 3. Statistical results of Two-Way ANOVA with Tukey's post-test are reported in supplementary table S2.



**Table S1.** List of species selected from the culture collection of the Stazione Zoologica with relative identification code.

| <b>Code</b> | <b>Species</b>               |
|-------------|------------------------------|
| FE7         | <i>Skeletonema marinoi</i>   |
| FE102       | <i>Amphidinium carterae</i>  |
| FE80        | <i>Thalassiosira rotula</i>  |
| FE205       | <i>Tetraselmis suecica</i>   |
| FE107       | <i>Alexandrium tamarense</i> |
| FE1320      | <i>Dunaliella salina</i>     |
| FE21        | <i>Chaetoceros affinis</i>   |
| FE32        | <i>Skeletonema japonicum</i> |

**Table S2.** Fatty acid composition of *Skeletonema marinoi* lipids by GC-MS analysis of FAME derivatives.

| <b>FAME</b>        | <b>Apex RT</b> | <b>%Area</b> |  |  |
|--------------------|----------------|--------------|--|--|
| <b>C14:0</b>       | <b>8,96</b>    | <b>4,79</b>  |  |  |
| <b>C16:4w1</b>     | <b>13,06</b>   | <b>2,16</b>  |  |  |
| <b>C16:3w4</b>     | <b>13,22</b>   | <b>16,23</b> |  |  |
| <b>C16:1+C16:2</b> | <b>13,59</b>   | <b>34,06</b> |  |  |
| <b>C16:0</b>       | <b>14,17</b>   | <b>5,1</b>   |  |  |
| <b>C18:3</b>       | <b>18,39</b>   | <b>0,05</b>  |  |  |
| <b>C18:4w3</b>     | <b>18,53</b>   | <b>6,81</b>  |  |  |
| <b>C18:2w6</b>     | <b>18,85</b>   | <b>0,76</b>  |  |  |
| <b>C18:1w9</b>     | <b>19,03</b>   | <b>0,52</b>  |  |  |
| <b>C18:1w7</b>     | <b>19,21</b>   | <b>0,4</b>   |  |  |
| <b>C18:0</b>       | <b>19,82</b>   | <b>1,59</b>  |  |  |
| <b>ARA</b>         | <b>23,35</b>   | <b>0,06</b>  |  |  |

**Table S3.** Statistical results for Two-Way ANOVA, Tukey post-test ( $\alpha = 0.01$ ) performed on proliferation assay for U-937, HCT-116 and MePR-2B cells treated with 25  $\mu\text{g/ml}$  of purified and commercial MAGs (Supplementary Figure S12). P-values $<0.01$  were considered significant.

| Tukey's multiple comparisons test | Mean  | 95,00% CI of diff | Summary | Adjusted p-Value |
|-----------------------------------|-------|-------------------|---------|------------------|
| <b>U-937 24 h</b>                 |       |                   |         |                  |
| ctr dms0 vs. SMAR-F2L             | 1475  | 123,6 to 2826     | *       | 0,0229           |
| ctr dms0 vs. MAG-C16:3            | 5070  | 3719 to 6421      | ****    | <0,0001          |
| ctr dms0 vs. MAG-C16:2            | 5790  | 4439 to 7141      | ****    | <0,0001          |
| ctr dms0 vs. MAG-EPA/C18:3        | 5495  | 4144 to 6846      | ****    | <0,0001          |
| ctr dms0 vs. MAG-C16:1            | 3715  | 2364 to 5066      | ****    | <0,0001          |
| ctr dms0 vs. MAG-C16:0            | 1905  | 553,6 to 3256     | **      | 0,0011           |
| ctr dms0 vs. MAG-C18:0            | 4775  | 3424 to 6126      | ****    | <0,0001          |
| ctr dms0 vs. MAG-ARA              | 5345  | 3994 to 6696      | ****    | <0,0001          |
| <b>U-937 48 h</b>                 |       |                   |         |                  |
| ctr dms0 vs. SMAR-F2L             | 19190 | 17839 to 20541    | ****    | <0,0001          |
| ctr dms0 vs. MAG-C16:3            | 17888 | 16536 to 19239    | ****    | <0,0001          |
| ctr dms0 vs. MAG-C16:2            | 12745 | 11394 to 14096    | ****    | <0,0001          |
| ctr dms0 vs. MAG-EPA/C18:3        | 13645 | 12294 to 14996    | ****    | <0,0001          |
| ctr dms0 vs. MAG-C16:1            | 8383  | 7032 to 9734      | ****    | <0,0001          |
| ctr dms0 vs. MAG-C16:0            | 6598  | 5247 to 7949      | ****    | <0,0001          |
| ctr dms0 vs. MAG-C18:0            | 8583  | 7231 to 9934      | ****    | <0,0001          |
| ctr dms0 vs. MAG-ARA              | 19459 | 18108 to 20810    | ****    | <0,0001          |
| <b>HCT-116 24 h</b>               |       |                   |         |                  |
| ctr dms0 vs. SMAR-F2L             | 1700  | 1047 to 2353      | ****    | <0,0001          |
| ctr dms0 vs. MAG-C16:3            | 5300  | 4647 to 5952      | ****    | <0,0001          |
| ctr dms0 vs. MAG-C16:2            | 2969  | 2316 to 3622      | ****    | <0,0001          |
| ctr dms0 vs. MAG-EPA/C18:3        | 2539  | 1886 to 3191      | ****    | <0,0001          |
| ctr dms0 vs. MAG-C16:1            | 3050  | 2397 to 3702      | ****    | <0,0001          |
| ctr dms0 vs. MAG-C16:0            | 1007  | 354,0 to 1660     | ***     | 0,0004           |
| ctr dms0 vs. MAG-C18:0            | 3997  | 3344 to 4650      | ****    | <0,0001          |
| ctr dms0 vs. MAG-ARA              | 6015  | 5362 to 6668      | ****    | <0,0001          |
| <b>HCT-116 48 h</b>               |       |                   |         |                  |
| ctr dms0 vs. SMAR-F2L             | 17960 | 17307 to 18613    | ****    | <0,0001          |
| ctr dms0 vs. MAG-C16:3            | 7260  | 6607 to 7913      | ****    | <0,0001          |
| ctr dms0 vs. MAG-C16:2            | 10210 | 9557 to 10863     | ****    | <0,0001          |
| ctr dms0 vs. MAG-EPA/C18:3        | 13210 | 12557 to 13863    | ****    | <0,0001          |
| ctr dms0 vs. MAG-C16:1            | 7270  | 6617 to 7923      | ****    | <0,0001          |
| ctr dms0 vs. MAG-C16:0            | 7078  | 6425 to 7730      | ****    | <0,0001          |
| ctr dms0 vs. MAG-C18:0            | 12193 | 11540 to 12845    | ****    | <0,0001          |
| ctr dms0 vs. MAG-ARA              | 7255  | 6602 to 7908      | ****    | <0,0001          |
| <b>MePR-2B 24 h</b>               |       |                   |         |                  |
| ctr dms0 vs. SMAR-F2L             | -245  | -1145 to 654,9    | ns      | 0,9917           |
| ctr dms0 vs. MAG-C16:3            | 35    | -864,9 to 934,9   | ns      | >0,9999          |
| ctr dms0 vs. MAG-C16:2            | 91,5  | -808,4 to 991,4   | ns      | >0,9999          |
| ctr dms0 vs. MAG-EPA/C18:3        | -238  | -1138 to 661,9    | ns      | 0,9932           |
| ctr dms0 vs. MAG-C16:1            | 236,5 | -663,4 to 1136    | ns      | 0,9934           |
| ctr dms0 vs. MAG-C16:0            | 198   | -701,9 to 1098    | ns      | 0,9981           |

|                            |      |                 |      |         |
|----------------------------|------|-----------------|------|---------|
| ctr dmso vs. MAG-C18:0     | 77,5 | -822,4 to 977,4 | ns   | >0,9999 |
| ctr dmso vs. MAG-ARA       | 98   | -801,9 to 997,9 | ns   | >0,9999 |
| <b>MePR-2B 48 h</b>        |      |                 |      |         |
| ctr dmso vs. SMAR-F2L      | 1649 | 748,6 to 2548   | **** |         |
| ctr dmso vs. MAG-C16:3     | 1715 | 815,1 to 2615   | **** | <0,0001 |
| ctr dmso vs. MAG-C16:2     | 1694 | 794,1 to 2594   | **** | <0,0001 |
| ctr dmso vs. MAG-EPA/C18:3 | 1233 | 332,6 to 2132   | **   | <0,0001 |
| ctr dmso vs. MAG-C16:1     | 983  | 83,06 to 1883   | *    | 0,0019  |
| ctr dmso vs. MAG-C16:0     | 950  | 50,06 to 1850   | *    | 0,0235  |
| ctr dmso vs. MAG-C18:0     | 1904 | 1004 to 2804    | **** | 0,0319  |
| ctr dmso vs. MAG-ARA       | 2605 | 1705 to 3505    | **** | <0,0001 |

---
